# Supplementary material
Source: MDPI journal article supplement (https://www.mdpi.com/2073-4441/15/6/1147)
Supplement: s1 [file s1]

Archive with 1 entries (1 files):
- water-2142792-supplementary.pdf
