# Supplementary material
Source: MDPI journal article supplement (https://www.mdpi.com/2073-4441/15/6/1147)
Supplement: s1 [file s1 › water-2142792-supplementary.pdf]

Supplementary material

# Can Remotely Sensed Snow Disappearance Explain Seasonal Water Supply?

Kaitlyn Bishay <sup>1,\*</sup>, Nels R. Bjarke <sup>1</sup>, Parthkumar Modi <sup>1</sup>, Justin M. Pflug <sup>2,3,4</sup> and Ben Livneh <sup>1,4</sup>

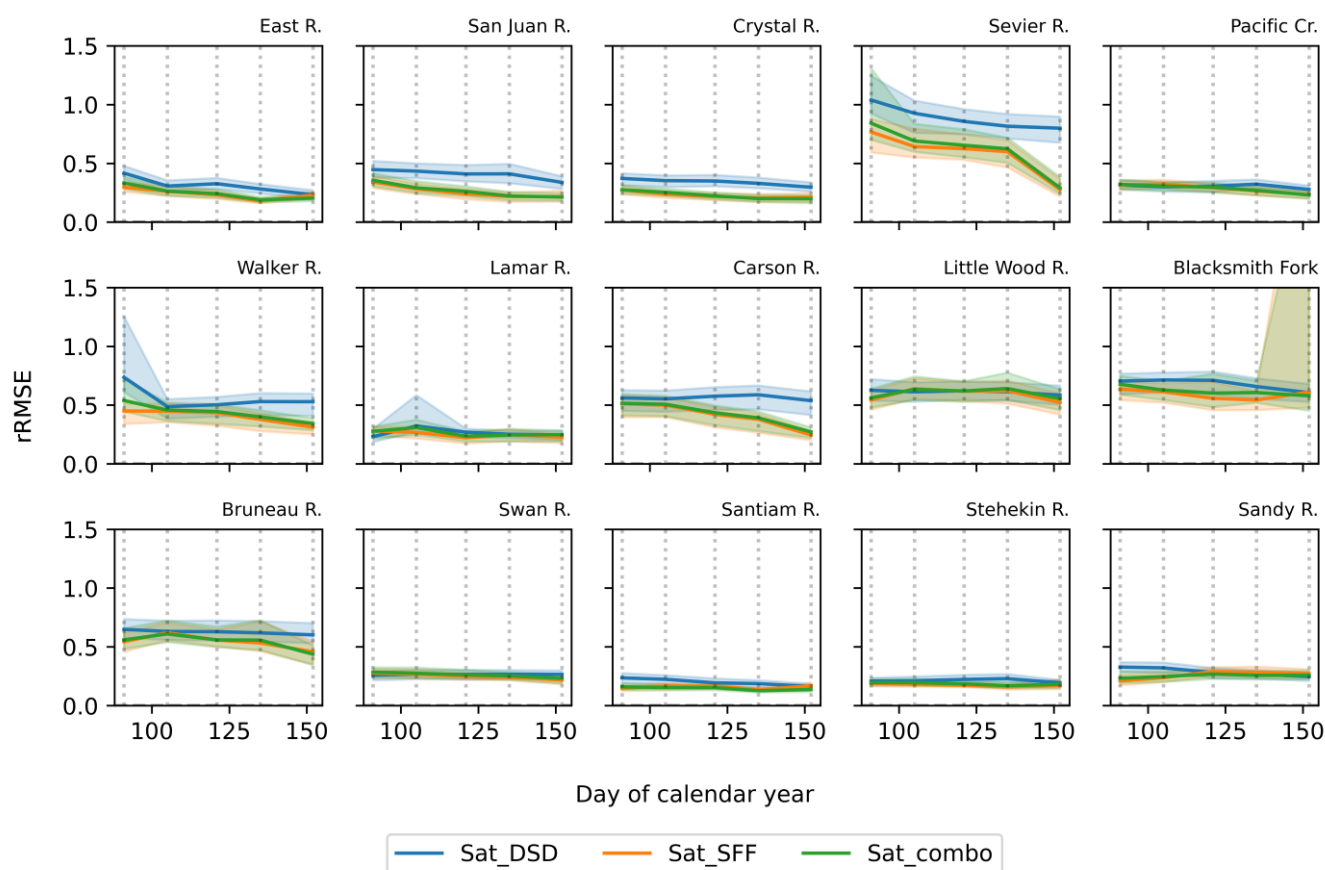

**Figure S1.** The median rRMSE statistics for three different satellite-based water supply forecasts with interquartile range (25/75 percentiles) shaded, for all 15 study basins. Vertical dotted lines denote the days chosen for forecasting—1 April, 15 April, 1 May, 15 May, and 1 June.

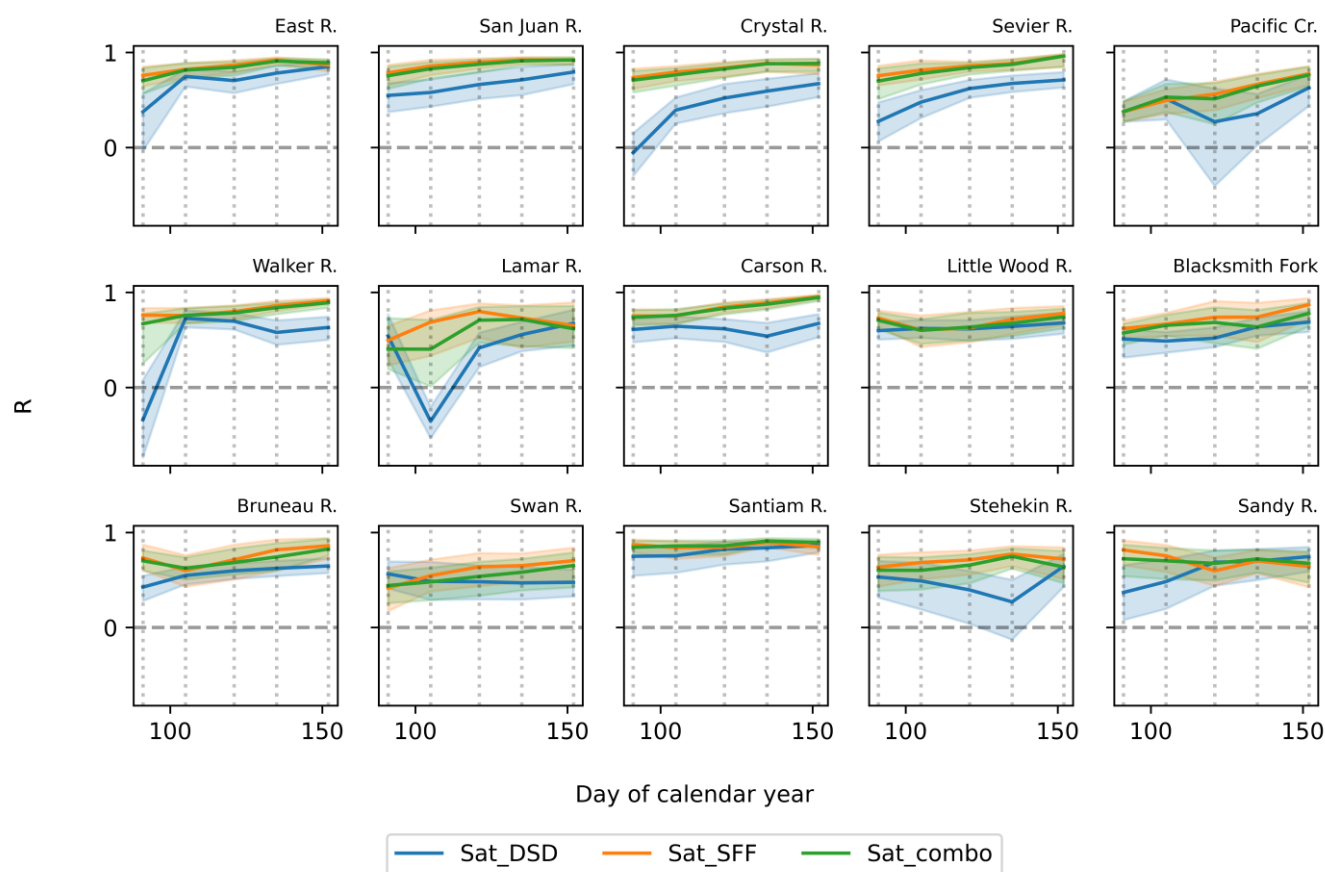

**Figure S2.** The median correlation,  $R$ , statistics for three different satellite-based water supply forecasts with interquartile range (25/75 percentiles) shaded, for all 15 study basins. Vertical dotted lines denote the days chosen for forecasting—1 April, 15 April, 1 May, 15 May, and 1 June.

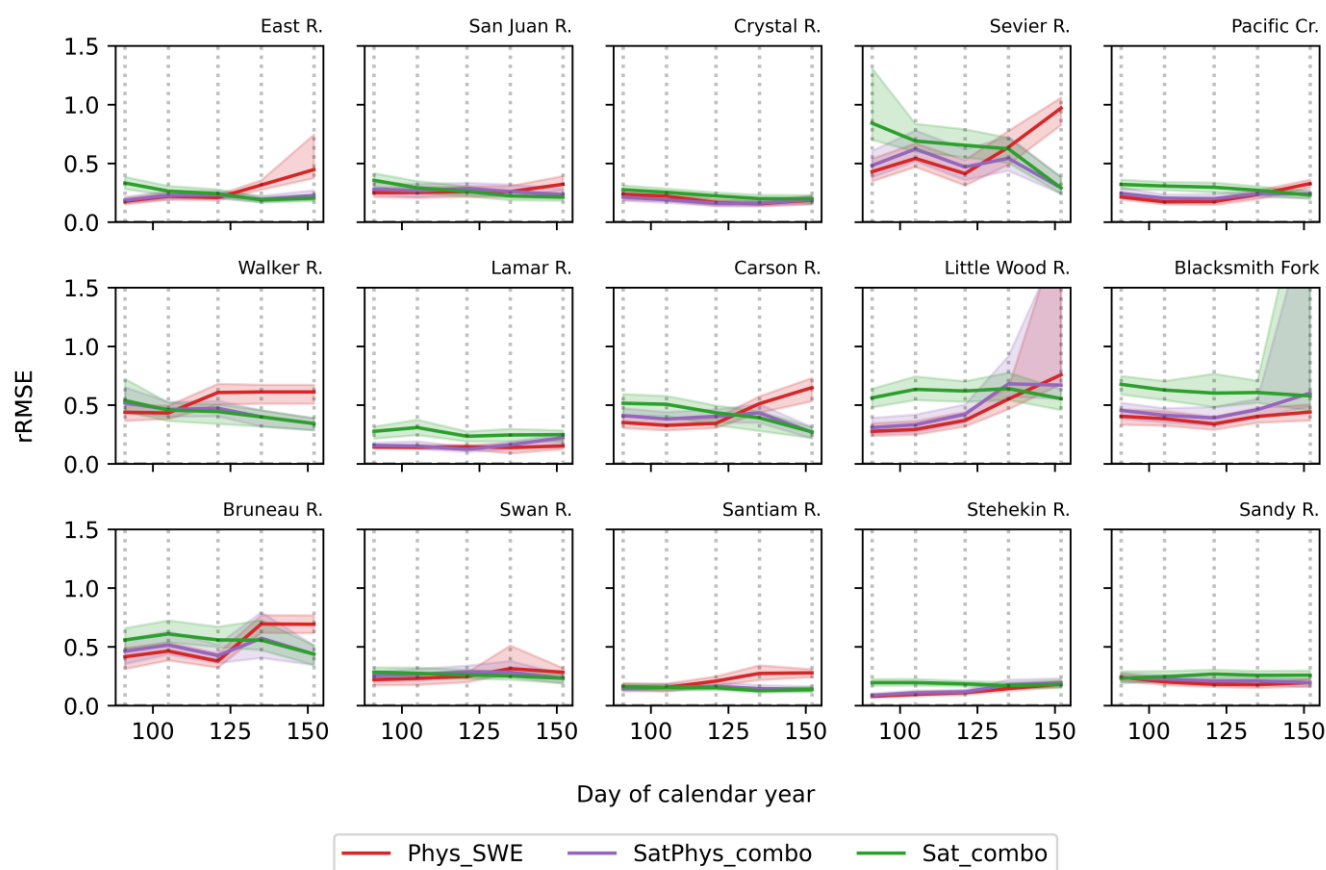

**Figure S3.** The median rRMSE statistics for three different satellite and in-situ-based water supply forecasts with interquartile range shaded, for all 15 study basins. Vertical dotted lines denote the days chosen for forecasting—1 April, 15 April, 1 May, 15 May, and 1 June.

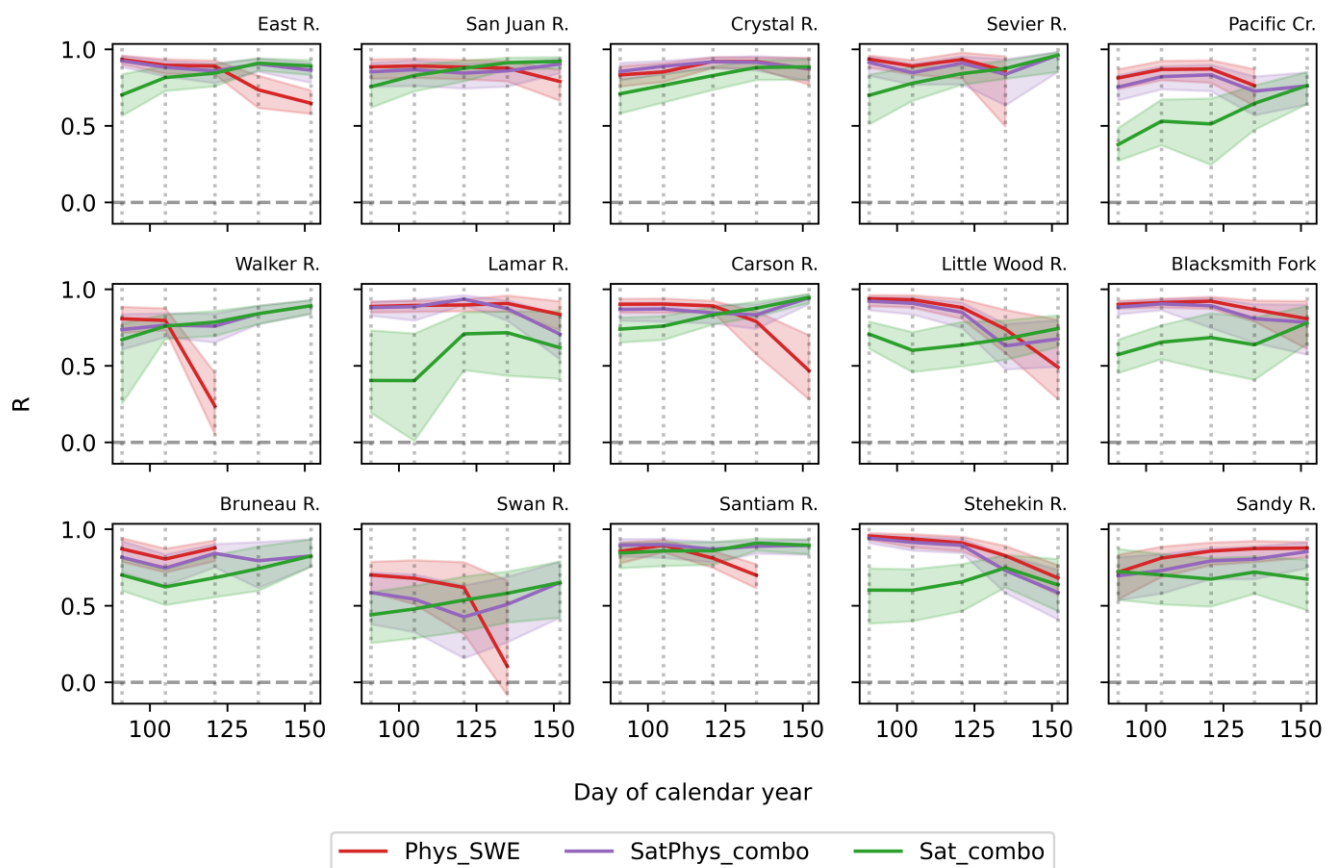

**Figure S4.** The median correlation,  $R$ , statistics for three different satellite and in-situ-based water supply forecasts with interquartile range shaded, for all 15 study basins. Vertical dotted lines denote the days chosen for forecasting—1 April, 15 April, 1 May, 15 May, and 1 June. Due to a lack of recorded SWE on the forecast dates for any year in the study period, some basins (e.g., Sevier R. and Pacific Cr.) have an undefined correlation coefficient,  $R$ , for the Phys\_SWE model. This is because Pearson's correlation coefficient,  $R$ , cannot be defined for a constant input array and, after complete snow ablation, SWE is equal to zero for all years studied. This has been reflected in the figure above.

**Table S1.** Correlation between USGS gage elevation and median PBIAS values for all basins calculated for each model and each forecast date. Values with a significant relationship ( $p$ -value < 0.05) are marked with an asterisk.

|                      | 1 April | 15 April | 1 May | 15 May | 1 June | Mean  | Median |
|----------------------|---------|----------|-------|--------|--------|-------|--------|
| <b>Sat_DSD</b>       | −0.30   | −0.13    | −0.30 | −0.24  | −0.14  | −0.22 | −0.24  |
| <b>Sat_SFF</b>       | −0.17   | −0.31    | −0.41 | −0.28  | 0.01   | −0.23 | −0.28  |
| <b>Sat_combo</b>     | 0.09    | −0.19    | −0.14 | −0.12  | 0.04   | −0.06 | −0.12  |
| <b>Phys_SWE</b>      | −0.10   | −0.29    | −0.36 | −0.35  | 0.19   | −0.18 | −0.29  |
| <b>SatPhys_Combo</b> | −0.04   | −0.26    | −0.46 | −0.21  | −0.02  | −0.20 | −0.21  |
| Mean                 | −0.10   | −0.24    | −0.34 | −0.24  | 0.02   |       |        |
| Median               | −0.10   | −0.26    | −0.36 | −0.24  | 0.01   |       |        |

**Disclaimer/Publisher’s Note:** The statements, opinions and data contained in all publications are solely those of the individual author(s) and contributor(s) and not of MDPI and/or the editor(s). MDPI and/or the editor(s) disclaim responsibility for any injury to people or property resulting from any ideas, methods, instructions or products referred to in the content.
